# Supplementary material
Source: publisher figshare collection journal article supplement (https://gsajournals.figshare.com/ndownloader/files/14166926)
Supplement: Supplementary file 1 [file 14166926]

Supplementary File 1. The accessions of annual and perennial *Glycine* species used for the estimation of genetic diversity and their Plant Introduction number, number assigned by CSIRO, Australia if available, province and country where collected with geographical location, i.e., longitude, latitude and elevation

| Species | PI number | ACC.NO | Province/county | Country | Longitude | Latitude | Elevation (m) |
| --- | --- | --- | --- | --- | --- | --- | --- |
| *Glycine max* | PI 081775b,c |  | Akita | Japan | 140 ͦ 09' | 39 ͦ 91' N |  |
| *Glycine max* | PI 097094b,c |  | Hwanghae Puk | North Korea | 126 ͦ 99' | 38 ͦ 78' N |  |
| *Glycine max* | PI 399043b,c |  | Cheju | South Korea | 126 ͦ 52' | 33 ͦ 06' N |  |
| *Glycine max* | PI 423954b,c |  | Lumamoto | Japan | 130 ͦ 71' | 32 ͦ 81' N |  |
| *Glycine max* | PI 504484c |  | NA | Taiwan | 120 ͦ 07' | 23 ͦ 07' N |  |
| *Glycine max* | PI 567293b,c |  | Gansu | China | 103 ͦ 89' | 36 ͦ 08' N |  |
| *Glycine max* | PI 567395b |  | Shaanxi | China | 109 ͦ 06' | 34 ͦ 07' N |  |
| *Glycine max* | PI 567700b,c |  | Anhui | China | 118 ͦ 54' | 32 ͦ 26 N |  |
| *Glycine max* | PI 587752b |  | Hubei | China | 114 ͦ 12' | 30 ͦ 41' N |  |
| *Glycine max* | PI 588047b |  | Guangdong | China | 113 ͦ 24' | 24 ͦ 43' N |  |
| *Glycine max* | PI 594579b |  | Hunan | China | 112 ͦ 93' | 28 ͦ 18' N |  |
| *Glycine max* | PI 594773b |  | Guangxi | China | 108 ͦ 03' | 22 ͦ 08' N |  |
| *Glycine max* | PI 603318b,c |  | Heilongjiang | China | 126 ͦ 87' | 45 ͦ 06' N |  |
| *Glycine max* | PI 603357b |  | Jilin | China | 125 ͦ 29' | 44 ͦ 03' N |  |
| *Glycine max* | PI 603424Ab |  | Nei Monggol | China | 111 ͦ 83' | 40 ͦ 89' N |  |
| *Glycine max* | PI 603756b,c |  | Zhejiang | China | 120 ͦ 13' | 30 ͦ 61' N |  |
| *Glycine soja* | PI 393551b |  | Chutung | Taiwan | 121 ͦ 01' | 24 ͦ 75' N |  |
| *Glycine soja* | PI 407027b,c |  | Akita | Japan | 142 ͦ 00' | 39 ͦ 91' N |  |
| *Glycine soja* | PI 407140b |  | Kumamoto | Japan | 131 ͦ 39' | 33 ͦ 67' N |  |
| *Glycine soja* | PI 407275b,c |  | Kyonggi | South Korea | 127 ͦ 12' | 35 ͦ 86' N |  |
| *Glycine soja* | PI 407282b |  | Cheju | South Korea | 127 ͦ 52' | 33 ͦ 05' N |  |
| *Glycine soja* | PI 407288b,c |  | Jilin | China | 127 ͦ 53' | 43 ͦ 84' N |  |
| *Glycine soja* | PI 407301b |  | Jiangsu | China | 119 ͦ 54' | 32 ͦ 26' N |  |
| *Glycine soja* | PI 447004b |  | Jilin | China | 126 ͦ 29' | 44 ͦ 03' N |  |
| *Glycine soja* | PI 458536b,c |  | Heilongjiang | China | 125 ͦ 87' | 45 ͦ 07' N |  |
| *Glycine soja* | PI 458538b |  | Heilongjiang | China | 127 ͦ 87' | 45 ͦ 08' N |  |
| *Glycine soja* | PI 468400Ab |  | Ningxia | China | 106 ͦ 26' | 38 ͦ 52' N |  |
| *Glycine soja* | PI 483465c |  | Shaanxi | China | 108 ͦ 09' | 34 ͦ 03' N |  |
| *Glycine soja* | PI 518282b |  | Unknown | Taiwan | 122 ͦ 01' | 24 ͦ 75' N |  |
| *Glycine canescens* | PI 399478b,c,d | G 1339 | Northern Territory | Australia | 134 ͦ 02' | 24 ͦ 16' S | 520 |
| *Glycine canescens* | PI 440930b,c,d | G 1851 | South Australia | Australia | 140 ͦ 44' | 27 ͦ 45' S | 100 |
| *Glycine canescens* | PI 440931b | G 1852 | South Australia | Australia | 137 ͦ 57' | 30 ͦ 07' S | 180 |
| *Glycine canescens* | PI 446934a,b,c,d | G 1232 | New South Wales | Australia | 142 ͦ 05' | 30 ͦ 09' S | 90 |
| *Glycine canescens* | PI 446938b,c,d | G 1240 | New South Wales | Australia | 144 ͦ 12' | 32 ͦ 05' S | 90 |
| *Glycine canescens* | PI 483191b | G 1249 | New South Wales | Australia | 143 ͦ 29' | 29 ͦ 17' S | 110 |
| *Glycine canescens* | PI 505160d | G 1473 | Northern Territory | Australia | 133 ͦ 09' | 25 ͦ 55' S | 500 |
| *Glycine canescens* | PI 509459 b | G 1966 | New South Wales | Australia | 145 ͦ 05' | 29 ͦ 15' S | 120 |
| *Glycine canescens* | PI 546959 b | G 2352 | South Australia | Australia | 139 ͦ 15' | 30 ͦ 03' S | 250 |
| *Glycine canescens* | PI 573043b,c,d | G 2353 | South Australia | Australia | 135 ͦ 45' | 32 ͦ 21' S | 180 |
| *Glycine canescens* | PI 573044b | G 1245 | Northern Territory | Australia | 134 ͦ 57' | 23 ͦ 00' S | 550 |
| *Glycine canescens* | PI 573045b,c,d | G 1481 | Western Australia | Australia | 120 ͦ 32' | 27 ͦ 25' S | 540 |
| *Glycine canescens* | PI 583943b,c,d | G 2191 | Queensland | Australia | 146 ͦ 14' | 26 ͦ 24' S | 400 |
| *Glycine canescens* | PI 583945b,c,d | G 2943 | Western Australia | Australia | 114 ͦ 17' | 25 ͦ 46' S | 10 |
| *Glycine canescens* | PI 583954b,c,d | G 2958 | Western Australia | Australia | 118 ͦ 27' | 22 ͦ 18' S | 460 |
| *Glycine canescens* | PI 591574b,d | G 2351 | Victoria | Australia | 142 ͦ 20' | 34 ͦ 45' S | 10 |
| *Glycine cyrtoloba* | NA | G 3127b,c | Queensland | Australia | 144 ͦ 57' | 17 ͦ 16' S | 580 |
| *Glycine cyrtoloba* | PI 446944a,b,c | G 1267 | Queensland | Australia | 149 ͦ 17' | 20 ͦ 49' S | 50 |
| *Glycine cyrtoloba* | PI 499924b,c | G 2618 | Queensland | Australia | 147 ͦ 24' | 18 ͦ 13' S | 3 |
| *Glycine cyrtoloba* | PI 505169b | G 1837 | Queensland | Australia | 148 ͦ 28' | 20 ͦ 16' S | 15 |
| *Glycine cyrtoloba* | PI 505171b,c | G 1841 | Queensland | Australia | 148 ͦ 28' | 20 ͦ 37' S | 300 |
| *Glycine cyrtoloba* | PI 505176b | G 1834 | Queensland | Australia | 144 ͦ 14' | 19 ͦ 36' S | 900 |
| *Glycine cyrtoloba* | PI 505178b | G 1835 | Queensland | Australia | 147 ͦ 00' | 19 ͦ 42' S | 60 |
| *Glycine cyrtoloba* | PI 595815b,c | G 2489 | Queensland | Australia | 153 ͦ 33' | 27 ͦ 26' S | 76 |
| *Glycine cyrtoloba* | PI 599403b | G 1102 | Queensland | Australia | 153 ͦ 22' | 28 ͦ 05' S | 50 |
| *Glycine cyrtoloba* | PI 599404b,c | G 1418 | Queensland | Australia | 145 ͦ 21' | 17 ͦ 23' S | 780 |
| *Glycine cyrtoloba* | PI 599405b,c | G 1465 | New South Wales | Australia | 150 ͦ 57' | 30 ͦ 37' S | 20 |
| *Glycine cyrtoloba* | PI 599407b,c | G 1623 | Queensland | Australia | 153 ͦ 06' | 25 ͦ 56' S | 5 |
| *Glycine falcata* | NA | G 2441b,c | Queensland | Australia | 151 ͦ 37' | 25 ͦ 37' S | 120 |
| *Glycine falcata* | NA | G 2719b,c | Queensland | Australia | 141 ͦ 51' | 20 ͦ 40' S | 120 |
| *Glycine falcata* | NA | G 1155a | Queensland | Australia | 146 ͦ 15' | 24 ͦ 53' S | 360 |
| *Glycine falcata* | PI 440975b,c | G 1153 | Queensland | Australia | 149 ͦ 38' | 25 ͦ 30' S | 200 |
| *Glycine falcata* | PI 499914b,c | G 2045 | Queensland | Australia | 148 ͦ 01' | 23 ͦ 05' S | 200 |
| *Glycine falcata* | PI 505180b,c | G 1825 | Queensland | Australia | 144 ͦ 23' | 20 ͦ 53' S | 350 |
| *Glycine falcata* | PI 509475b,c | G 2086 | Queensland | Australia | 145 ͦ 15' | 23 ͦ 24' S | 284 |
| *Glycine falcata* | PI 612197b,c | G 3019 | Northern Territory | Australia | 133 ͦ 13' | 23 ͦ 25' S | 640 |
| *Glycine falcata* | PI 612231b,c | G 2649 | Queensland | Australia | 140 ͦ 14' | 21 ͦ 12' S | 300 |
| *Glycine falcata* | PI 612236b,c | G 2656 | Northern Territory | Australia | 137 ͦ 59' | 19 ͦ 55' S | 240 |
| *Glycine falcata* | PI 612237b,c | G 2657 | Northern Territory | Australia | 136 ͦ 03' | 19 ͦ 20' S | 230 |
| *Glycine falcata* | PI 653460b,c | G 2081 | Queensland | Australia | 148 ͦ 07' | 23 ͦ 58' S | 250 |
| *Glycine falcata* | PI 653462b,c | G 2088 | Queensland | Australia | 145 ͦ 10' | 23 ͦ 32' S | 285 |
| *Glycine stenophita* | NA | G 1494b,c | New South Wales | Australia | 148 ͦ 39' | 31 ͦ 43' S | 280 |
| *Glycine stenophita* | NA | G 1510b,c | New South Wales | Australia | 150 ͦ 32' | 29 ͦ 15' S | 340 |
| *Glycine stenophita* | NA | G 2881b,c | Queensland | Australia | 149 ͦ 33' | 26 ͦ 37' S | 330 |
| *Glycine stenophita* | PI 440989b,c | G 1106 | New South Wales | Australia | 147 ͦ 80' | 33 ͦ 20' S | 260 |
| *Glycine stenophita* | PI 546978b,c | G 2178 | Queensland | Australia | 150 ͦ 40' | 26 ͦ 46' S | 300 |
| *Glycine stenophita* | PI 546979b | G 2179 | Queensland | Australia | 149 ͦ 55' | 25 ͦ 59' S | 260 |
| *Glycine stenophita* | PI 546980b,c | G 2180 | Queensland | Australia | 149 ͦ 47' | 25 ͦ 38' S | 190 |
| *Glycine stenophita* | PI 546986b,c | G 2189 | Queensland | Australia | 145 ͦ 48' | 24 ͦ 35' S | 330 |
| *Glycine stenophita* | PI 546987b,c | G 2190 | Queensland | Australia | 146 ͦ 36' | 25 ͦ 30' S | 410 |
| *Glycine stenophita* | PI 547003b,c | G 2214 | Queensland | Australia | 146 ͦ 25' | 26 ͦ 05' S | 350 |
| *Glycine stenophita* | PI 653507b,c | G 1651 | Queensland | Australia | 149 ͦ 49' | 30 ͦ 13' S | 228 |
| *Glycine stenophita* | PI 653508a,b,c | G 1974 | New South Wales | Australia | 148 ͦ 45' | 31 ͦ 20' S | 38 |
| *Glycine syndetika* | NA | G 1772b,c | Queensland | Australia | 144 ͦ 49' | 18 ͦ 08' S | 500 |
| *Glycine syndetika* | PI 505211c | G 1775 | Queensland | Australia | 145 ͦ 05' | 18 ͦ 45' S | 450 |
| *Glycine syndetika* | NA | G 1780b,c | Queensland | Australia | 144 ͦ 18' | 20 ͦ 01' S | 300 |
| *Glycine syndetika* | NA | G 1784b,c | Queensland | Australia | 145 ͦ 24' | 20 ͦ 32' S | 400 |
| *Glycine syndetika* | NA | G 2471b,c | Queensland | Australia | 146 ͦ 24' | 19 ͦ 56' S | 400 |
| *Glycine syndetika* | NA | G 2724b,c | Queensland | Australia | 144 ͦ 20' | 20 ͦ 06' S | 400 |
| *Glycine syndetika* | PI 441000b,c | G 1300 | Queensland | Australia | 144 ͦ 51' | 18 ͦ 02' S | 762 |
| *Glycine syndetika* | PI 505252a,b,c | G 1777 | Queensland | Australia | 144 ͦ 33' | 18 ͦ 57' S | 600 |
| *Glycine syndetika* | PI 563899b,c | G 2321 | Queensland | Australia | 147 ͦ 17' | 23 ͦ 39' S | 350 |
| *Glycine syndetika* | PI 573074b,c | G 1410 | Queensland | Australia | 144 ͦ 41' | 18 ͦ 59' S | 560 |
| *Glycine syndetika* | PI 573076b,c | G 2073 | Queensland | Australia | 136 ͦ 34' | 19 ͦ 48' S | 350 |
| *Glycine tomentella* | NA | G 1403a | Queensland | Australia | 145 ͦ 20' | 16 ͦ 45' S | 380 |
| *Glycine tomentella* | NA | G 2076b,c | Queensland | Australia | 148 ͦ 28' | 20 ͦ 37' S | 300 |
| *Glycine tomentella* | NA | G 2487b,c | Queensland | Australia | 142 ͦ 33' | 11 ͦ 42' S | 100 |
| *Glycine tomentella* | PI 446995b,c | G 1366 |  | Papua New Guinea | 147 ͦ 00' | 6 ͦ 45' S | 66 |
| *Glycine tomentella* | PI 505203c | G 1303 | Western Australia | Australia | 128 ͦ 53' | 16 ͦ 01' S | 96 |
| *Glycine tomentella* | PI 505222b,c | G 1749 | Queensland | Australia | 143 ͦ 04' | 12 ͦ 58' S | 20 |
| *Glycine tomentella* | PI 505229b,c | G 1799 | Queensland | Australia | 147 ͦ 00' | 19 ͦ 42' S | 60 |
| *Glycine tomentella* | PI 505241b,c | G 1767 | Queensland | Australia | 144 ͦ 03' | 15 ͦ 56' S | 100 |
| *Glycine tomentella* | PI 505260b,c | G 1746 | Queensland | Australia | 142 ͦ 02' | 12 ͦ 42' S | 10 |
| *Glycine tomentella* | PI 509491b | G 1545 | Queensland | Australia | 153 ͦ 12' | 27 ͦ 57' S | 170 |
| *Glycine tomentella* | PI 573079b,c | G 1407 | Queensland | Australia | 146 ͦ 50' | 19 ͦ 43' S | 210 |
| *Glycine tomentella* | PI 604474b,c | G 2040 | Queensland | Australia | 142 ͦ 31' | 10 ͦ 43' S | 20 |
| *Glycine tomentella* | PI 604484b,c | G 2586 | Western Australia | Australia | 125 ͦ 41' | 14 ͦ 49' S | 170 |
| *Glycine tomentella* | PI 653467b,c | G 1419 | Queensland | Australia | 144 ͦ 28' | 17 ͦ 80' S | 360 |
|  |  |  |  |  |  |  |  |

NA: Not assigned

The latitudes and longitudes of *G. max* and *G. soja* accessions were determined using Google Maps based upon their collection province/county provided by the GRIN

a Accessions used for transcriptome sequencing for the selection of orthologs used in the genetic diversity analysis

b Accessions used for the genetic diversity analysis

c Accessions used for the multi-species phylogenetic analysis presented in Figure 2

d Accessions used for the phylogenetic analysis of the *G. canescens* accessions presented in Figure 3
